# Supplementary material for: Commencing insulin glargine 100 U/mL therapy in individuals with type 2 diabetes: Determinants of achievement of HbA1c goal less than 7.0%
Source: PubMed Central journal article supplement — Diabetes Obes Metab. 2019 Jan 10;21(2):321–9. doi: 10.1111/dom.13607 (PMC6590355; doi:10.1111/dom.13607), 2019-01-10

## **ONLINE-ONLY SUPPLEMENTAL MATERIALS**

These supplemental materials have been provided by the authors to give the readers additional information about the study.

Supplement to: Owens DR, *et al.* Commencing insulin glargine 100 U/mL therapy in people with type 2 diabetes: Determinants of achievement of HbA1c goal <7.0%

## **SUPPLEMENTAL MATERIALS**

### **Commencing insulin glargine 100 U/mL therapy in people with type 2 diabetes: Determinants of achievement of HbA1c goal <7.0%**

David R. Owens MD<sup>1</sup> | Wolfgang Landgraf PhD<sup>2</sup> | Brian M. Frier MD<sup>3</sup> | Mei Zhang PhD<sup>4</sup> | Philip D. Home MD<sup>5</sup> | Luigi Meneghini MD<sup>6</sup> | Geremia B. Bolli MD<sup>7</sup>

<sup>1</sup>Swansea University, Diabetes Research Group Cymru, College of Medicine, Swansea, UK. <sup>2</sup>Sanofi, Frankfurt, Germany. <sup>3</sup>The Queen's Medical Research Institute, University of Edinburgh, Edinburgh, UK.

<sup>4</sup>Sanofi US, Bridgewater, NJ, USA. <sup>5</sup>Newcastle University, Newcastle upon Tyne, UK. <sup>6</sup>University of Texas Southwestern Medical Center and Parkland Health & Hospital System, Dallas, TX, USA.

<sup>7</sup>University of Perugia School of Medicine, Perugia, Italy

| <b>TABLE OF CONTENTS</b> |                                                                                                                                                                                                                                                                                                                 | <b>PAGE</b> |
|--------------------------|-----------------------------------------------------------------------------------------------------------------------------------------------------------------------------------------------------------------------------------------------------------------------------------------------------------------|-------------|
| Table S1.                | Change in HbA1c from baseline to Week 24 by HbA1c-responder group and concomitant oral antidiabetes drug used during the entire study period.                                                                                                                                                                   | 3           |
| Table S2.                | Univariable and multivariable analyses using potential prognostic and explanatory factors to estimate the probability of reaching an HbA1c of <7.0% (<53 mmol/mol) at week 24 in participants with type 2 diabetes using standardized predictors for continuous variables in the multivariable analysis models. | 4           |
| Figure S1.               | Participant distribution and OAD use by Week 24 HbA1c-responder group.                                                                                                                                                                                                                                          | 6           |
| Figure S2.               | Mean daily Gla-100 doses (A), HbA1c (B), FPG (C), and changes from baseline to Week 24 according to HbA1c responder groups, and probability of achieving an HbA1c of <7.0% according to baseline HbA1c (D) based on the univariable analysis.                                                                   | 7           |
| Figure S3.               | Final daily Gla-100 dose (units/kg) and increments from baseline to Week 24 by HbA1c-responder groups and hypoglycaemia frequency (PG <3.9 mmol/L; <70 mg/dL) during 24-week study period.                                                                                                                      | 8           |
| Figure S4.               | 2-hr self-measured post-prandial glucose levels and changes from baseline according to HbA1c-responder groups at Week 24.                                                                                                                                                                                       | 9           |
| Figure S5.               | Incidences of confirmed overall and nocturnal hypoglycaemia among people with type 2 diabetes mellitus by number of events reported during 24 weeks and by HbA1c responder group.                                                                                                                               | 10          |
| Figure S6.               | Mean body weight and change according to hypoglycaemia event frequency during the study period and by HbA1c-responder group at Week 24.                                                                                                                                                                         | 11          |

**TABLE S1.** Change in HbA1c from baseline to Week 24 by HbA1c-responder group and concomitant oral antidiabetes drug used during the entire study period.

|                                             | <b>Good responders</b><br>(HbA1c <7.0%;<br><53 mmol/mol) | <b>Suboptimal responders</b><br>(HbA1c 7.0–8.0%;<br>53–64 mmol/mol) | <b>Minimal responders</b><br>(HbA1c >8.0%;<br>>64 mmol/mol) | <b>Total</b>    |
|---------------------------------------------|----------------------------------------------------------|---------------------------------------------------------------------|-------------------------------------------------------------|-----------------|
| <b>HbA1c – overall, %</b>                   | <i>n</i> = 1584                                          | <i>n</i> = 1262                                                     | <i>n</i> = 569                                              | <i>N</i> = 3415 |
| Baseline                                    | 8.41 (0.95)                                              | 8.82 (0.97)                                                         | 9.44 (0.98)                                                 | 8.73 (1.03)     |
| Week 24                                     | 6.39 (0.41)                                              | 7.42 (0.30)                                                         | 8.91 (0.83)                                                 | 7.19 (1.01)     |
| Change from baseline                        | -2.02 (0.99)                                             | -1.40 (0.97)                                                        | -0.54 (1.10)                                                | -1.54 (1.13)    |
| HbA1c <7.0% at Week 24, <i>n</i> (%)        |                                                          |                                                                     |                                                             | 1584 (46.4)     |
| <b>HbA1c – metformin only, %</b>            | <i>n</i> = 341                                           | <i>n</i> = 185                                                      | <i>n</i> = 76                                               | <i>N</i> = 602  |
| Baseline                                    | 8.43 (1.08)                                              | 8.92 (0.95)                                                         | 9.42 (1.18)                                                 | 8.70 (1.11)     |
| Week 24                                     | 6.37 (0.41)                                              | 7.38 (0.31)                                                         | 8.92 (0.84)                                                 | 7.00 (0.98)     |
| Change from baseline                        | -2.06 (1.12)                                             | -1.54 (0.98)                                                        | -0.50 (1.22)                                                | -1.70 (1.20)    |
| HbA1c <7.0% at Week 24, <i>n</i> (%)        |                                                          |                                                                     |                                                             | 341 (56.6)      |
| <b>HbA1c – metformin + sulfonyleurea, %</b> | <i>n</i> = 769                                           | <i>n</i> = 624                                                      | <i>n</i> = 180                                              | <i>N</i> = 1573 |
| Baseline                                    | 8.32 (0.88)                                              | 8.71 (0.94)                                                         | 9.30 (0.93)                                                 | 8.58 (0.96)     |
| Week 24                                     | 6.43 (0.39)                                              | 7.41 (0.29)                                                         | 8.70 (0.64)                                                 | 7.08 (0.84)     |
| Change from baseline                        | -1.89 (0.91)                                             | -1.30 (0.93)                                                        | -0.60 (1.03)                                                | -1.51 (1.03)    |
| HbA1c <7.0% at Week 24, <i>n</i> (%)        |                                                          |                                                                     |                                                             | 769 (48.9)      |
| <b>HbA1c –sulfonyleurea only, %</b>         | <i>n</i> = 278                                           | <i>n</i> = 334                                                      | <i>n</i> = 258                                              | <i>N</i> = 870  |
| Baseline                                    | 8.60 (0.89)                                              | 8.94 (0.97)                                                         | 9.52 (0.95)                                                 | 9.00 (1.01)     |
| Week 24                                     | 6.33 (0.47)                                              | 7.46 (0.30)                                                         | 9.03 (0.91)                                                 | 7.57 (1.22)     |
| Change from baseline                        | -2.27 (0.97)                                             | -1.48 (0.99)                                                        | -0.49 (1.12)                                                | -1.44 (1.24)    |
| HbA1c <7.0% at Week 24, <i>n</i> (%)        |                                                          |                                                                     |                                                             | 278 (32.0)      |
| <b>HbA1c – other, %</b>                     | <i>n</i> = 196                                           | <i>n</i> = 119                                                      | <i>n</i> = 55                                               | <i>N</i> = 370  |
| Baseline                                    | 8.50 (1.01)                                              | 8.92 (1.04)                                                         | 9.58 (0.97)                                                 | 8.80 (1.08)     |
| Week 24                                     | 6.40 (0.36)                                              | 7.43 (0.30)                                                         | 9.00 (0.88)                                                 | 7.12 (1.02)     |
| Change from baseline                        | -2.10 (1.01)                                             | -1.49 (1.02)                                                        | -0.58 (1.07)                                                | -1.68 (1.15)    |
| HbA1c <7.0% at Week 24, <i>n</i> (%)        |                                                          |                                                                     |                                                             | 196 (53.0)      |

Mean (standard deviation) or *n* (%). Group numbers may vary due to missing values. HbA1c, glycated haemoglobin A1c.

**TABLE S2.** Univariable and multivariable analyses using potential prognostic and explanatory factors to estimate the probability of reaching an HbA1c of <7.0% (<53 mmol/mol) at week 24 in participants with type 2 diabetes using standardized predictors for continuous variables in the multivariable analysis models.

| Variable                                                                                 | Categorical or continuous <sup>†</sup>  | Odds ratio (95% CI) | P-value |
|------------------------------------------------------------------------------------------|-----------------------------------------|---------------------|---------|
| <b>Univariable analysis</b>                                                              |                                         |                     |         |
| Age at baseline                                                                          | Per SD change                           | 1.02 (0.96, 1.09)   | 0.513   |
| Sex                                                                                      | Women vs men                            | 0.76 (0.66, 0.87)   | <0.0001 |
| Body weight at baseline                                                                  | ≥83.0 vs <83.0 kg                       | 1.38 (1.20, 1.58)   | <0.0001 |
|                                                                                          | Continuous (per SD change) <sup>‡</sup> | 1.17 (1.09, 1.25)   | <0.0001 |
| BMI at baseline                                                                          | ≥30.0 vs <30.0 kg/m <sup>2</sup>        | 1.21 (1.06, 1.38)   | 0.006   |
|                                                                                          | Continuous (per SD change)              | 1.10 (1.02, 1.17)   | 0.008   |
| Diabetes duration                                                                        | ≥10 vs <10 years                        | 0.61 (0.53, 0.70)   | <0.0001 |
|                                                                                          | Continuous (per SD change) <sup>‡</sup> | 0.78 (0.73, 0.84)   | <0.0001 |
| HbA1c at baseline                                                                        | ≥8.5 vs <8.5% <sup>¶</sup>              | 0.35 (0.30, 0.40)   | <0.0001 |
|                                                                                          | Continuous (per SD change) <sup>‡</sup> | 0.52 (0.49, 0.57)   | <0.0001 |
| FPG at baseline                                                                          | ≥11.1 vs <11.1 mmol/L <sup>§</sup>      | 0.59 (0.51, 0.68)   | <0.0001 |
|                                                                                          | Continuous (per SD) <sup>‡</sup>        | 0.74 (0.69, 0.80)   | <0.0001 |
| 2-h SMPG at baseline (all meals)                                                         | ≥11.7 vs <11.7 mmol/L <sup>#</sup>      | 0.48 (0.41, 0.56)   | <0.0001 |
|                                                                                          | Continuous (per SD change) <sup>‡</sup> | 0.61 (0.56, 0.66)   | <0.0001 |
| Baseline fasting C-peptide                                                               | ≥1.2 vs <1.2 nmol/L                     | 1.00 (0.84, 1.20)   | 0.97    |
|                                                                                          | Continuous (per SD change) <sup>‡</sup> | 1.05 (0.96, 1.14)   | 0.28    |
| Sulfonylurea use during study                                                            | Yes vs no                               | 0.61 (0.52, 0.71)   | <0.0001 |
| Hypoglycaemia <sup>†</sup> during study                                                  | No vs yes                               | 0.65 (0.57, 0.75)   | <0.0001 |
| Change in FPG                                                                            | Continuous (per SD change) <sup>‡</sup> | 0.96 (0.89, 1.02)   | 0.19    |
| Change in 2-h SMPG (all meals)                                                           | Continuous (per SD change) <sup>‡</sup> | 0.99 (0.92, 1.07)   | 0.76    |
| Change in body weight                                                                    | Continuous (per 1.0 kg)                 | 0.74 (0.69, 0.80)   | <0.0001 |
| Final Gla-100 dose                                                                       | Continuous (per 0.1 U/kg)               | 0.87 (0.78, 0.90)   | <0.0001 |
| <b>Multivariable analysis model 1 (categorical and continuous<sup>†</sup> variables)</b> |                                         |                     |         |
| Sex                                                                                      | Women vs men                            | 0.76 (0.64, 0.91)   | 0.0021  |
| Diabetes duration                                                                        | ≥10 vs <10 years                        | 0.63 (0.53, 0.75)   | <0.0001 |
| HbA1c at baseline                                                                        | ≥8.5 vs <8.5% mmol/mol <sup>¶</sup>     | 0.38 (0.32, 0.45)   | <0.0001 |
| 2-h SMPG at baseline (all meals)                                                         | ≥11.7 vs <11.7 mmol/L <sup>#</sup>      | 0.73 (0.61, 0.87)   | 0.0005  |
| Body weight at baseline                                                                  | ≥83.0 vs <83.0 kg                       | 1.29 (1.09, 1.54)   | 0.0034  |
| Sulfonylurea use during study                                                            | Yes vs no                               | 0.59 (0.49, 0.71)   | <0.0001 |
| Change in body weight                                                                    | Continuous (per SD change)              | 0.78 (0.71, 0.86)   | <0.0001 |
| Hypoglycaemia <sup>†</sup> during study                                                  | No vs yes                               | 0.62 (0.53, 0.74)   | <0.0001 |

**TABLE S2 (CONT'D).** Univariable and multivariable analyses using potential prognostic and explanatory factors to estimate the probability of reaching an HbA1c of <7.0% (<53 mmol/mol) at week 24 in participants with type 2 diabetes using standardized predictors for continuous variables in the multivariable analysis models.

| Variable                                                                   | Categorical or continuous <sup>†</sup> | Odds ratio (95% CI) | P-value |
|----------------------------------------------------------------------------|----------------------------------------|---------------------|---------|
| <b>Multivariable analysis model using continuous<sup>†</sup> variables</b> |                                        |                     |         |
| Sex                                                                        | Women vs men                           | 0.70 (0.60, 0.83)   | <0.0001 |
| Diabetes duration                                                          | per year                               | 0.79 (0.73, 0.86)   | <0.0001 |
| HbA1c at baseline                                                          | per SD change                          | 0.53 (0.47, 0.59)   | <0.0001 |
| FPG at baseline                                                            | per SD change                          | 1.20 (1.07, 1.36)   | 0.003   |
| 2-h SMPG at baseline (all meals)                                           | per SD change                          | 0.78 (0.69, 0.87)   | <0.0001 |
| BMI at baseline                                                            | per SD change                          | 1.20 (1.09, 1.33)   | 0.0003  |
| Change in body weight                                                      | per SD change                          | 0.80 (0.73, 0.88)   | <0.0001 |
| Hypoglycaemia <sup>†</sup> during study                                    | No vs yes                              | 0.64 (0.54, 0.76)   | <0.0001 |

For multivariable analysis,  $n = 2626$  patients were included.

<sup>†</sup> The use of standardized predictors in the model removed the impact by units; therefore, analysis of different units resulted in the same OR for each unit (eg, HbA1c: per %-unit or per mmol/mol; FPG & 2-h SMPG: per mg/dL or per mmol/L). <sup>‡</sup>Confirmed with PG <3.9 mmol/L or severe hypoglycaemia. <sup>¶</sup>≥69 vs <69 mmol/mol. <sup>§</sup>≥200 mg/dL vs <200 mg/dL. <sup>#</sup>≥210 mg/dL vs <210 mg/dL.

BMI, body mass index; CI, confidence interval; FPG, fasting plasma glucose; Gla-100, glargine 100 units/mL; HbA1c, glycated haemoglobin A1c; PG, plasma glucose; SMPG, self-monitored plasma glucose.

**FIGURE S1:** Participant distribution and OAD use by Week 24 HbA1c-responder group.

\*Includes all participants in the Gla-100 and comparator arms who received metformin, sulfonylurea, or metformin plus sulfonylurea or plus other OADs (including thiazolidinediones, gliptins and glinides) as add-on therapy.

Gla-100, glargine 100 units/mL; MET, metformin; OAD, oral anti-hyperglycaemic drug; SU, sulfonylurea.

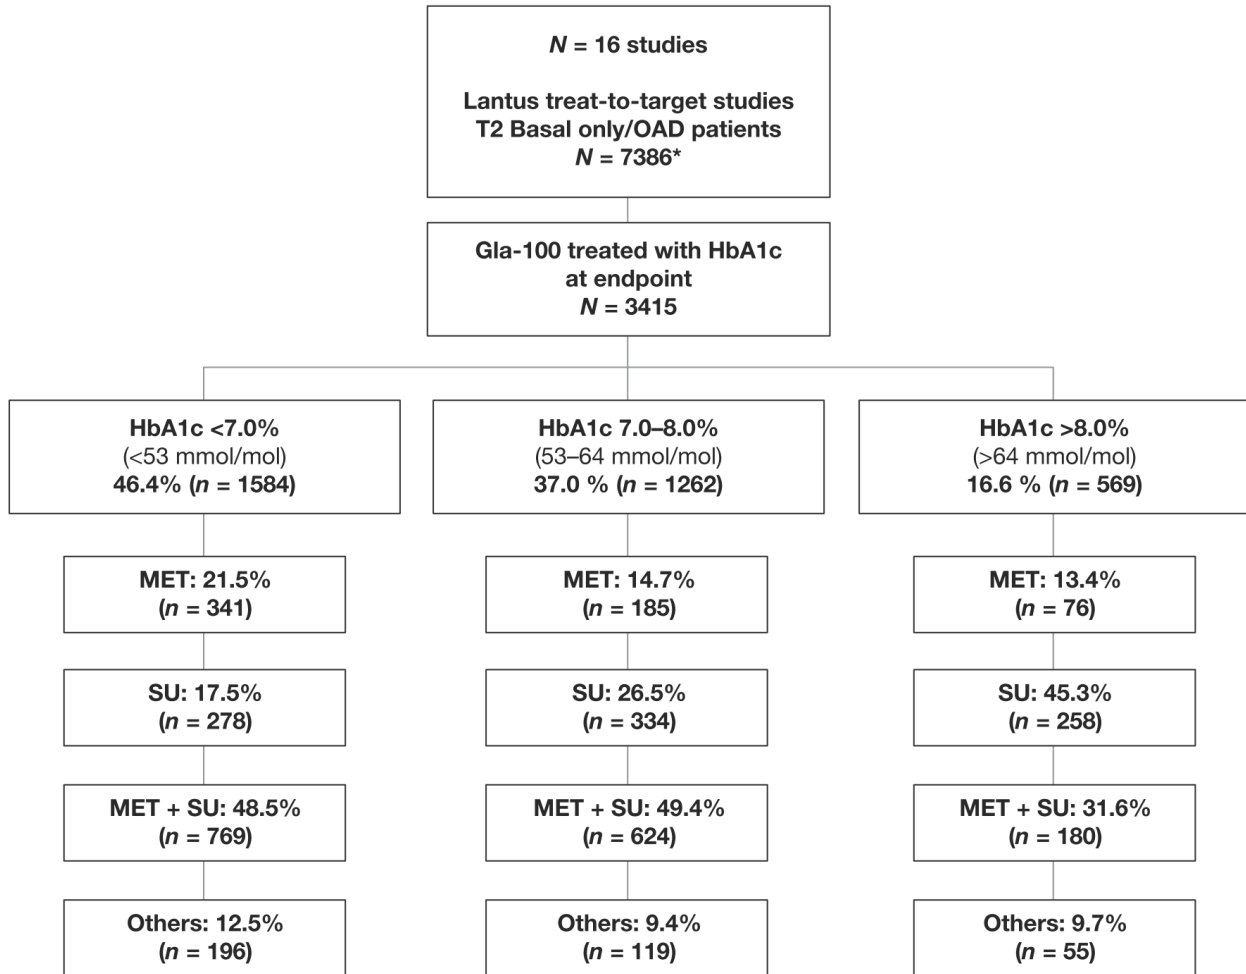

**FIGURE S2.** Mean daily Gla-100 doses (A), HbA1c (B), and FPG (C),

Grey bars indicate baseline values; black bars indicate values at 24 weeks.

FPG, fasting plasma glucose; Gla-100, glargine 100 units/mL; HbA1c, glyated haemoglobin A1c.

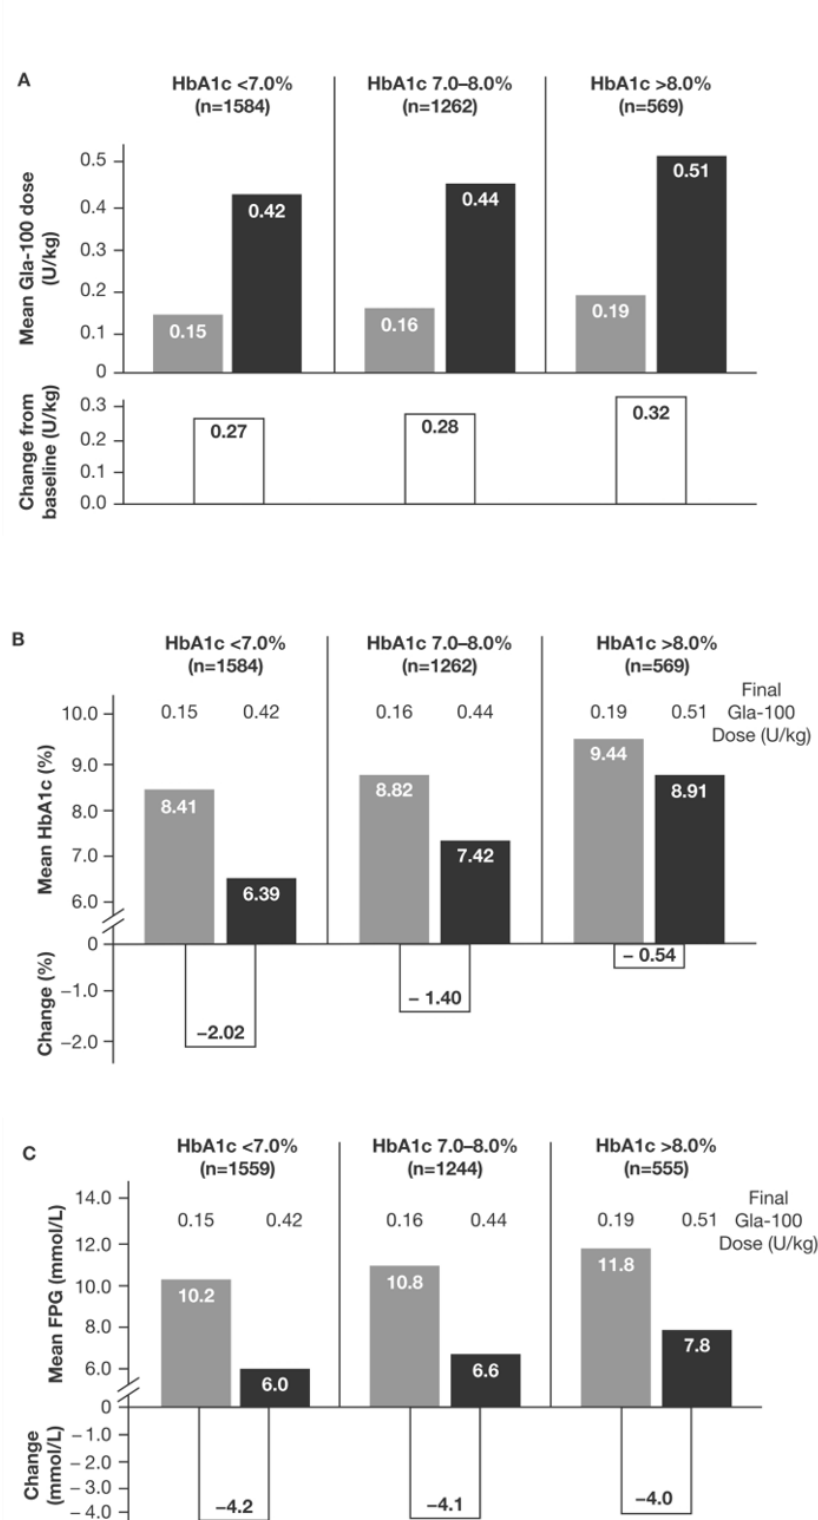



**FIGURE S3.** Final daily Gla-100 dose (units/kg) and increments from baseline to Week 24 by HbA1c-responder groups and hypoglycaemia frequency (plasma glucose <3.9 mmol/L; <70 mg/dL) during the 24-week study period.

Gla-100, glargine 100 units/mL; HbA1c, glycated haemoglobin A1c.

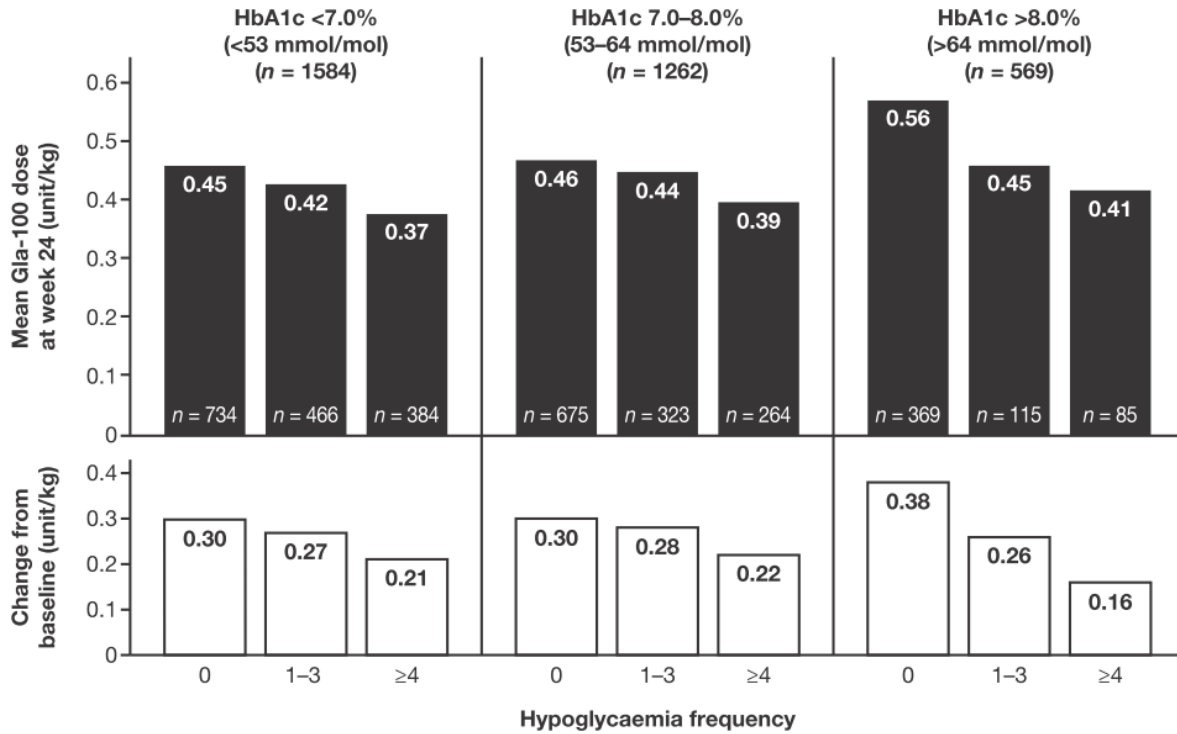

**FIGURE S4.** 2-h self-measured post-prandial glucose levels and changes from baseline according to HbA1c-responder groups at Week 24.

ALL, all meals combined; BRE, breakfast; DIN, dinner; LUN, lunch; 2-h SMPG, 2-h self-measured plasma glucose.

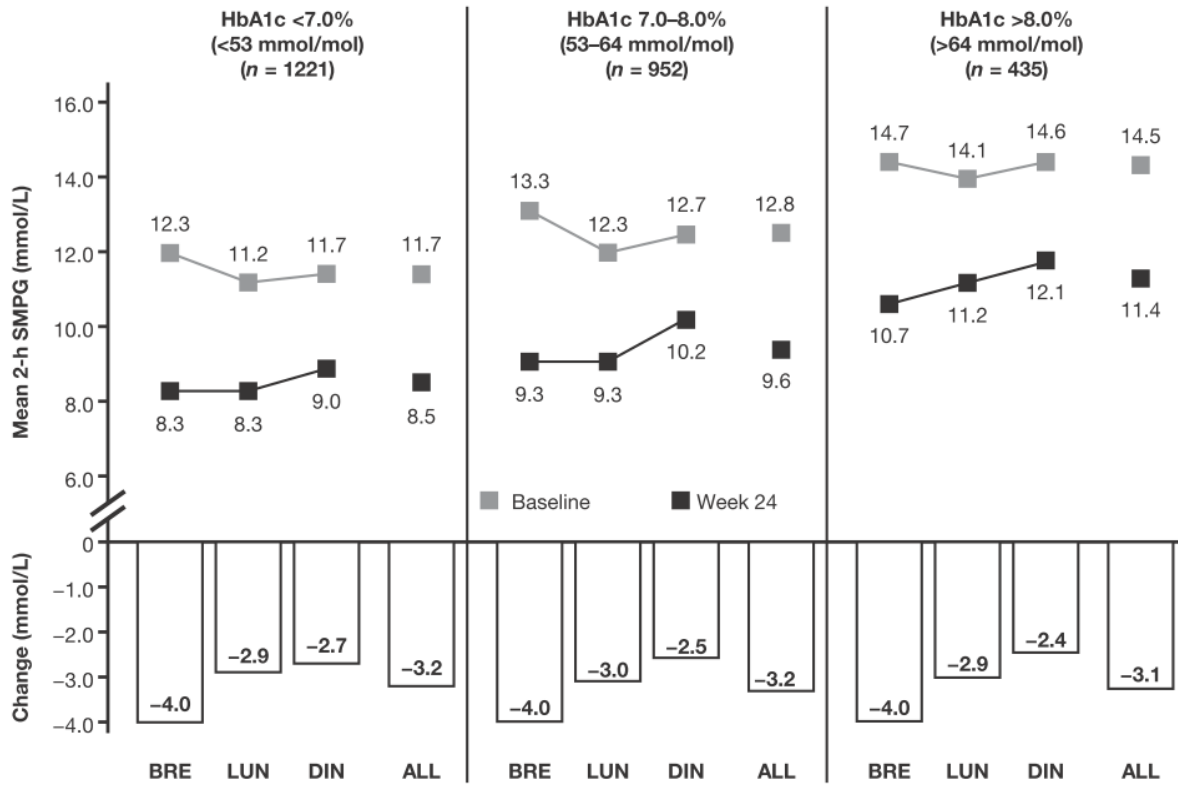

**FIGURE S5.** Incidences of confirmed overall and nocturnal hypoglycaemia among people with type 2 diabetes mellitus by number of events reported during 24 weeks and by HbA1c responder group.

Insets refer to mean final Gla-100 dose and BL mean fasting C-peptide levels per subgroup.

BL, baseline; Gla-100, glargine 100 units/mL; HbA1c, glycated haemoglobin A1c; PG, plasma glucose.

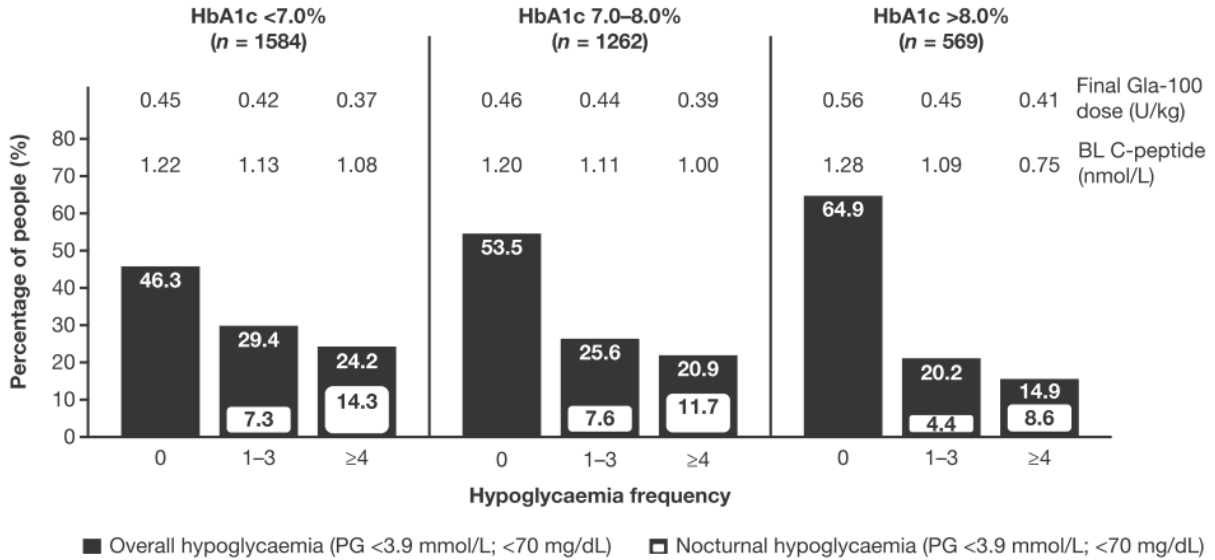

**FIGURE S6:** Mean body weight and change according to hypoglycaemia event frequency during the study period and by HbA1c-responder group at Week 24.

HbA1c, glycosylated haemoglobin A1c.

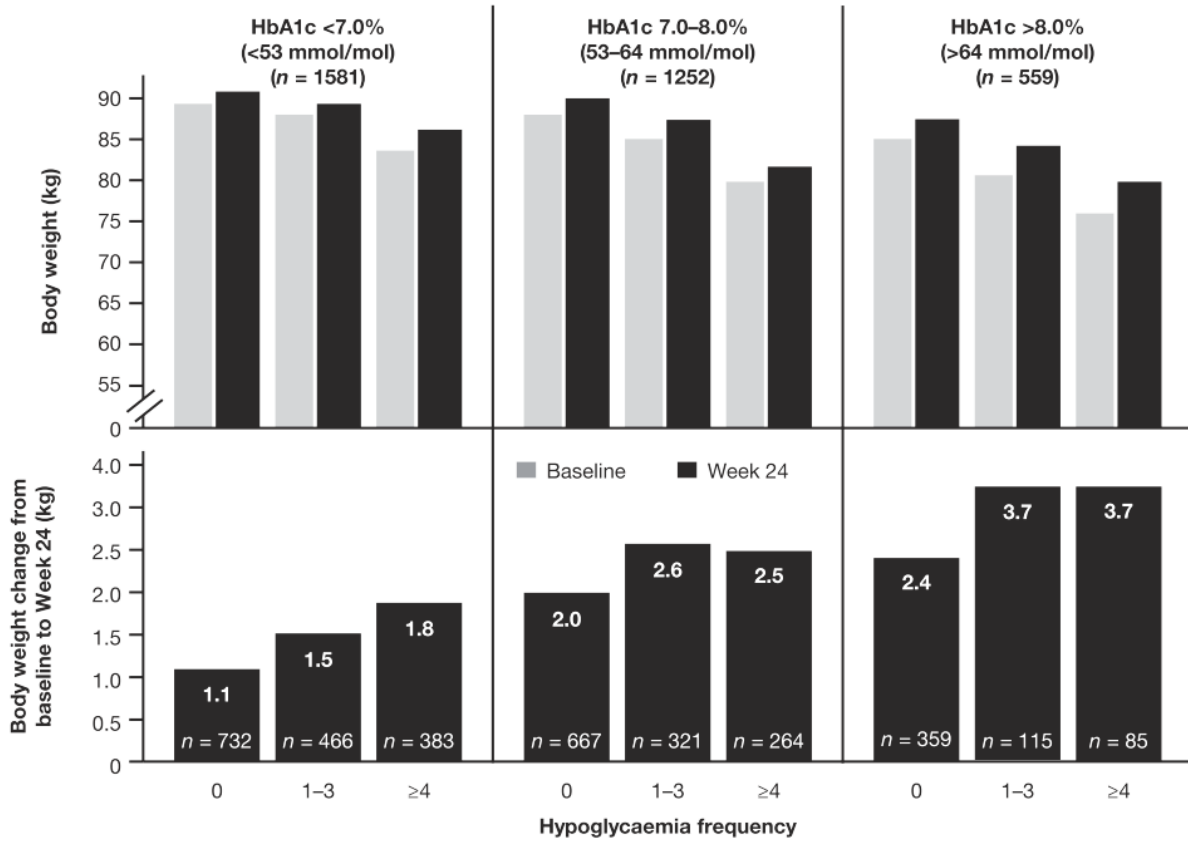

Supplement: DOM-21-321-s001.pdf [file DOM-21-321-s001.pdf]
